# Supplementary material
Source: PubMed Central journal article supplement (PMC5164841)

# Fig 1

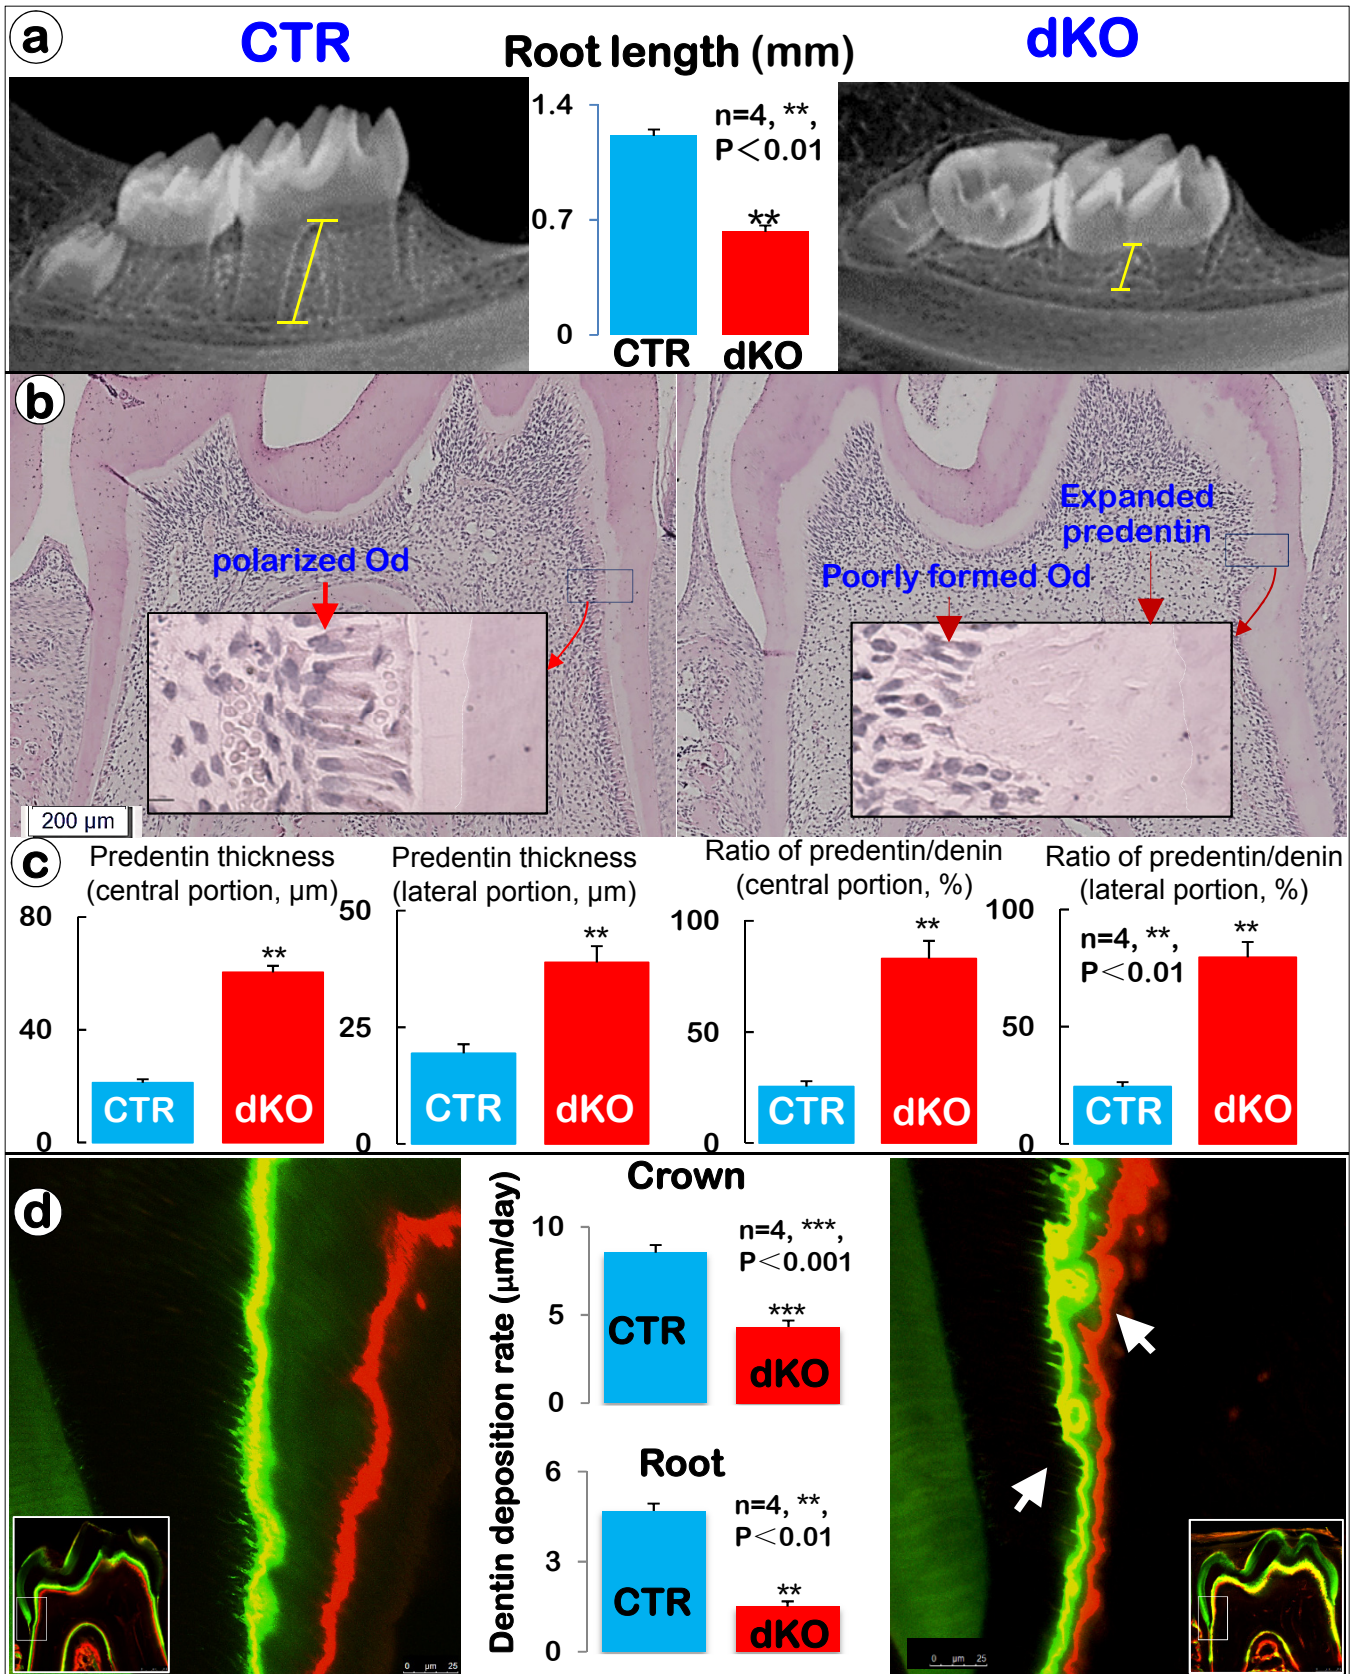



**Fig 2**

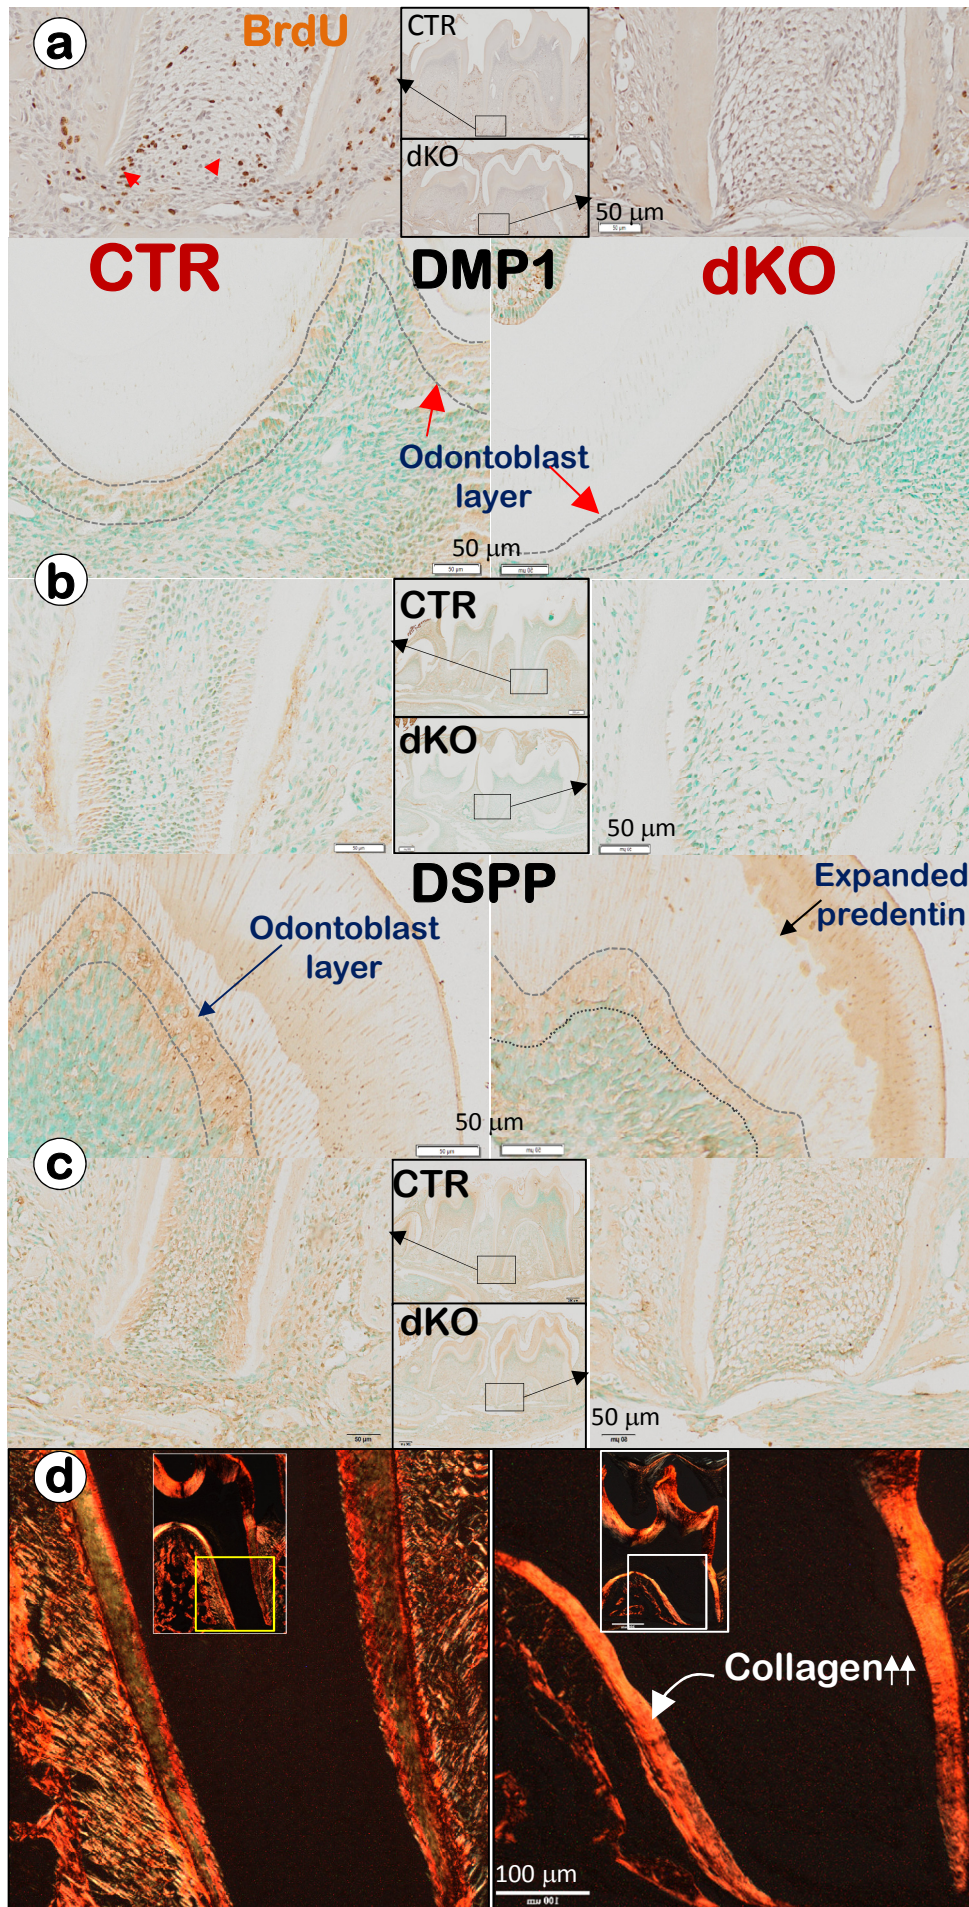



**Fig 3**

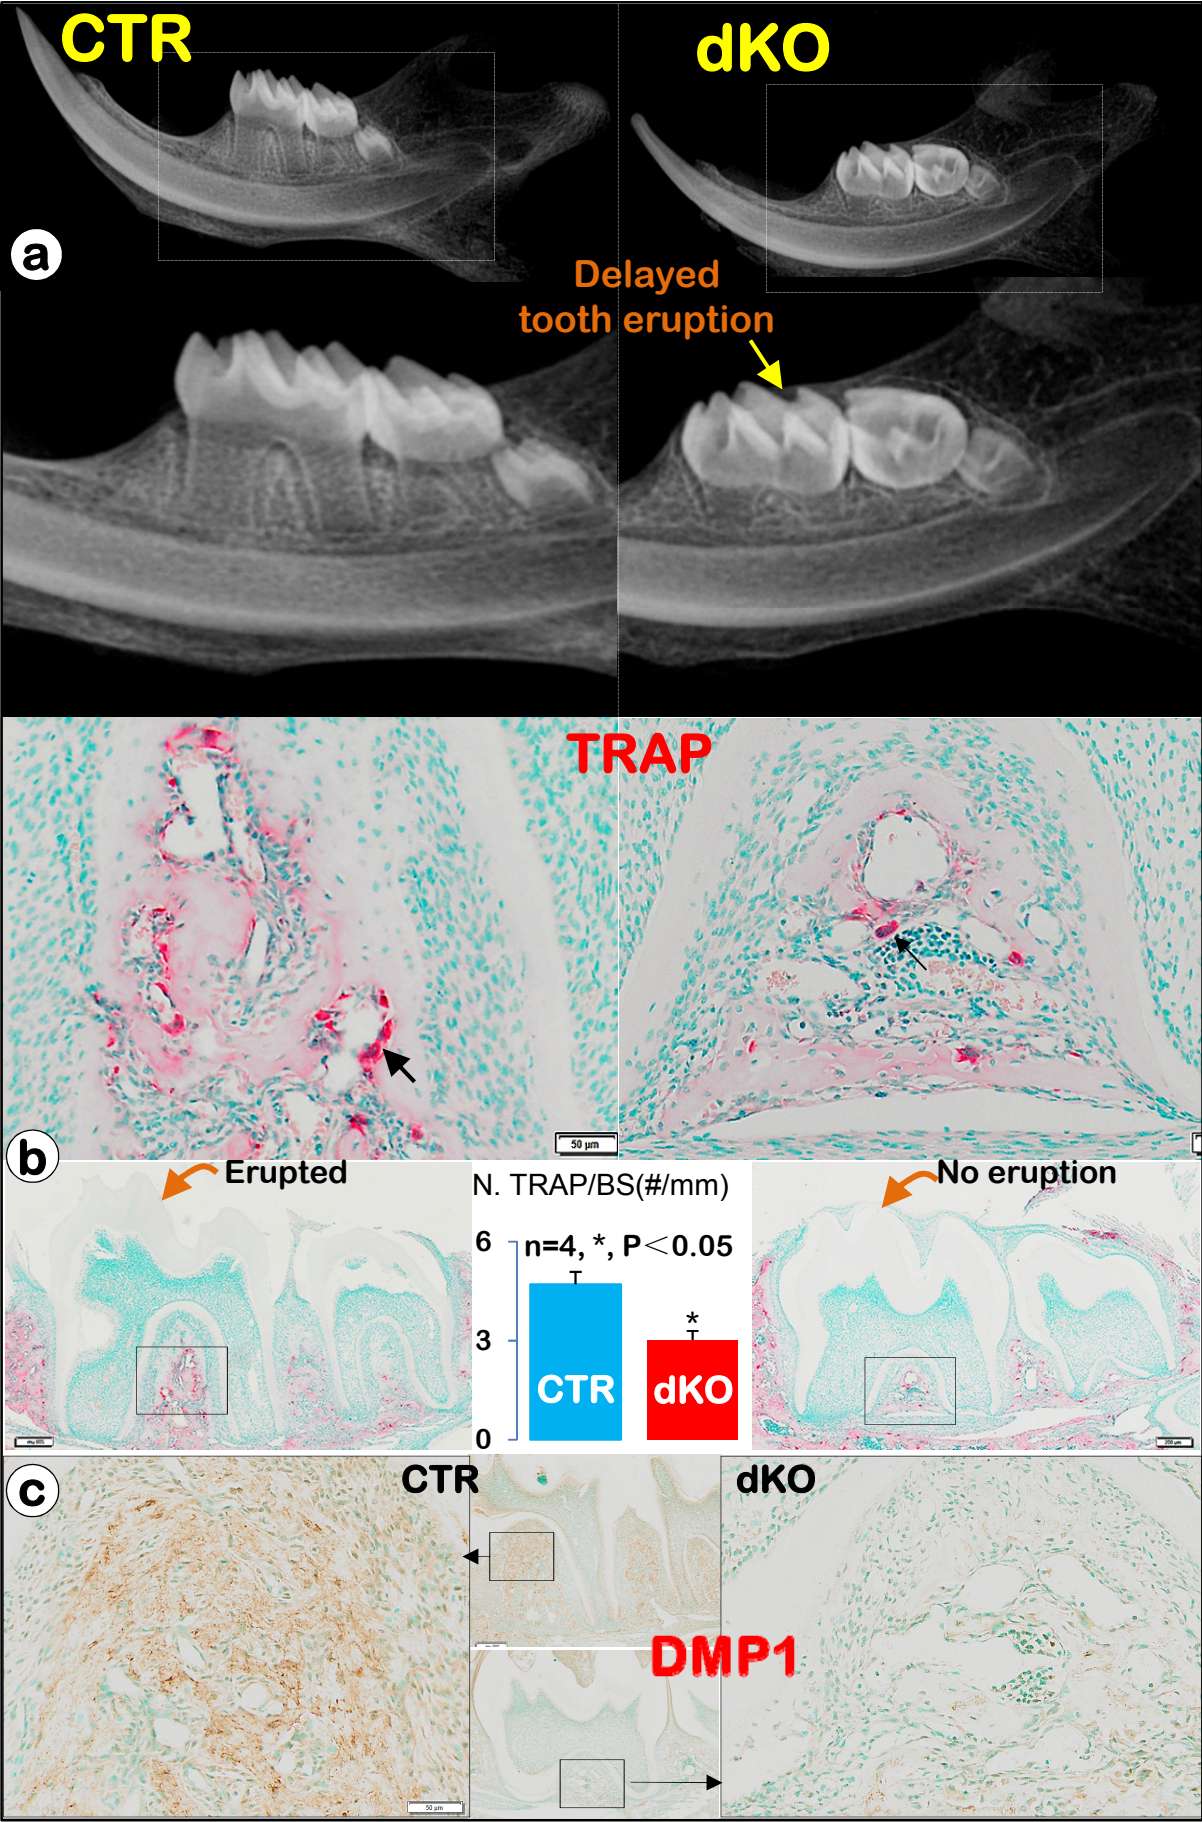

**Fig 4**

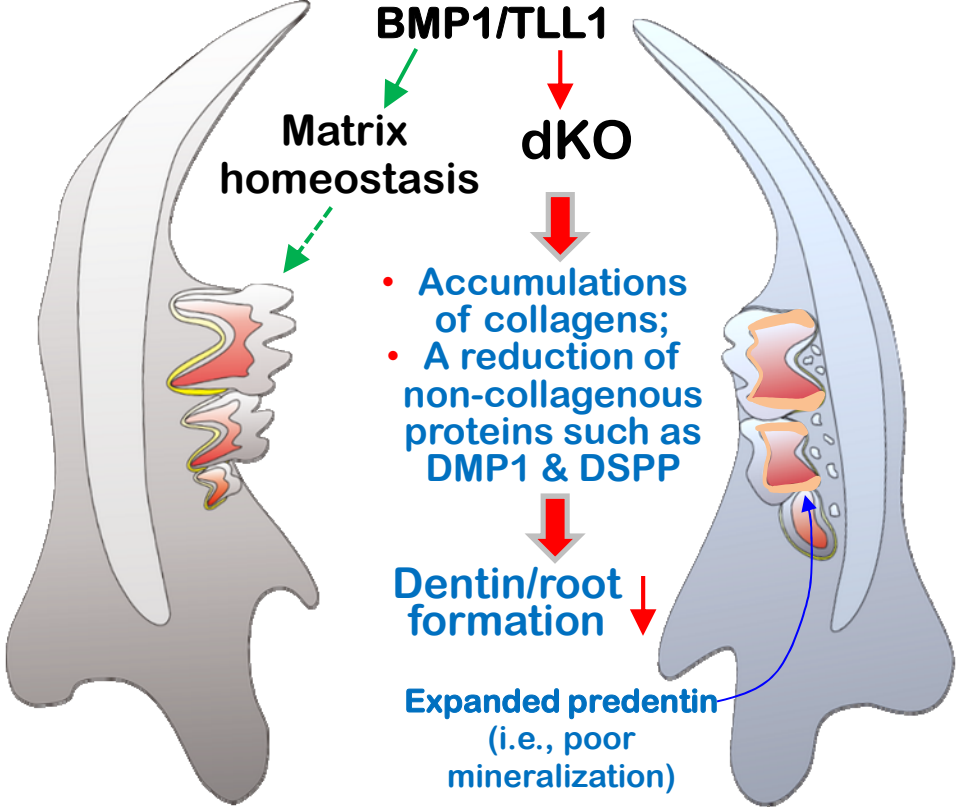

Supplement: NIHMS817179-supplement-1.pdf [file NIHMS817179-supplement-1.pdf]

# Supplement Fig 1

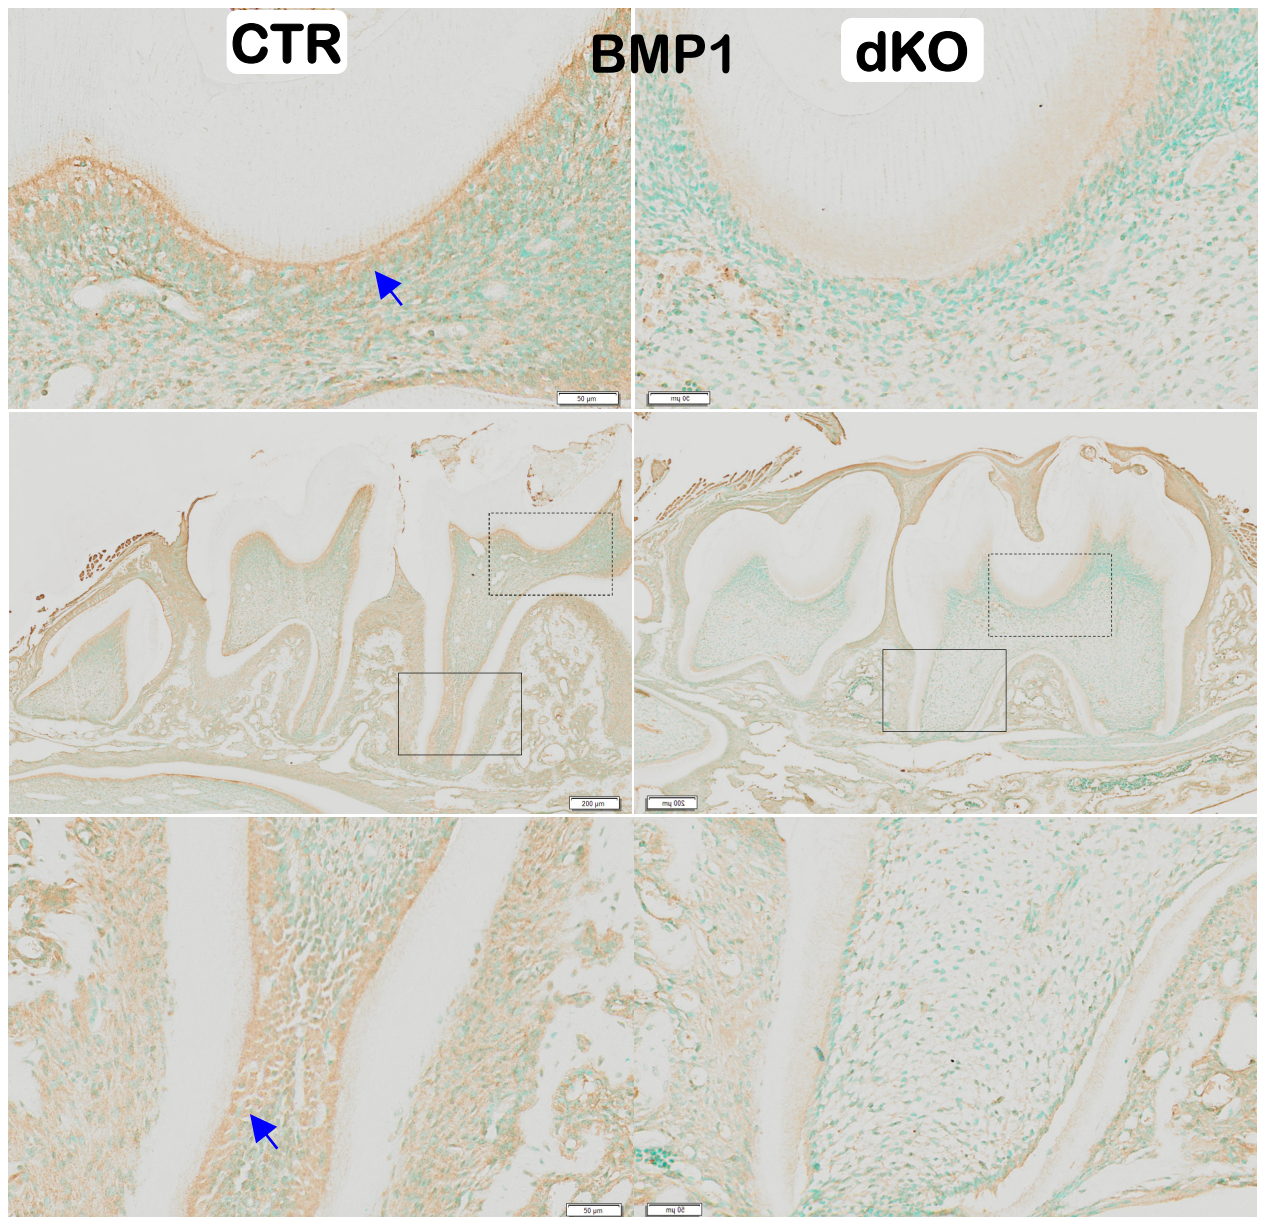

Supplement Fig 2

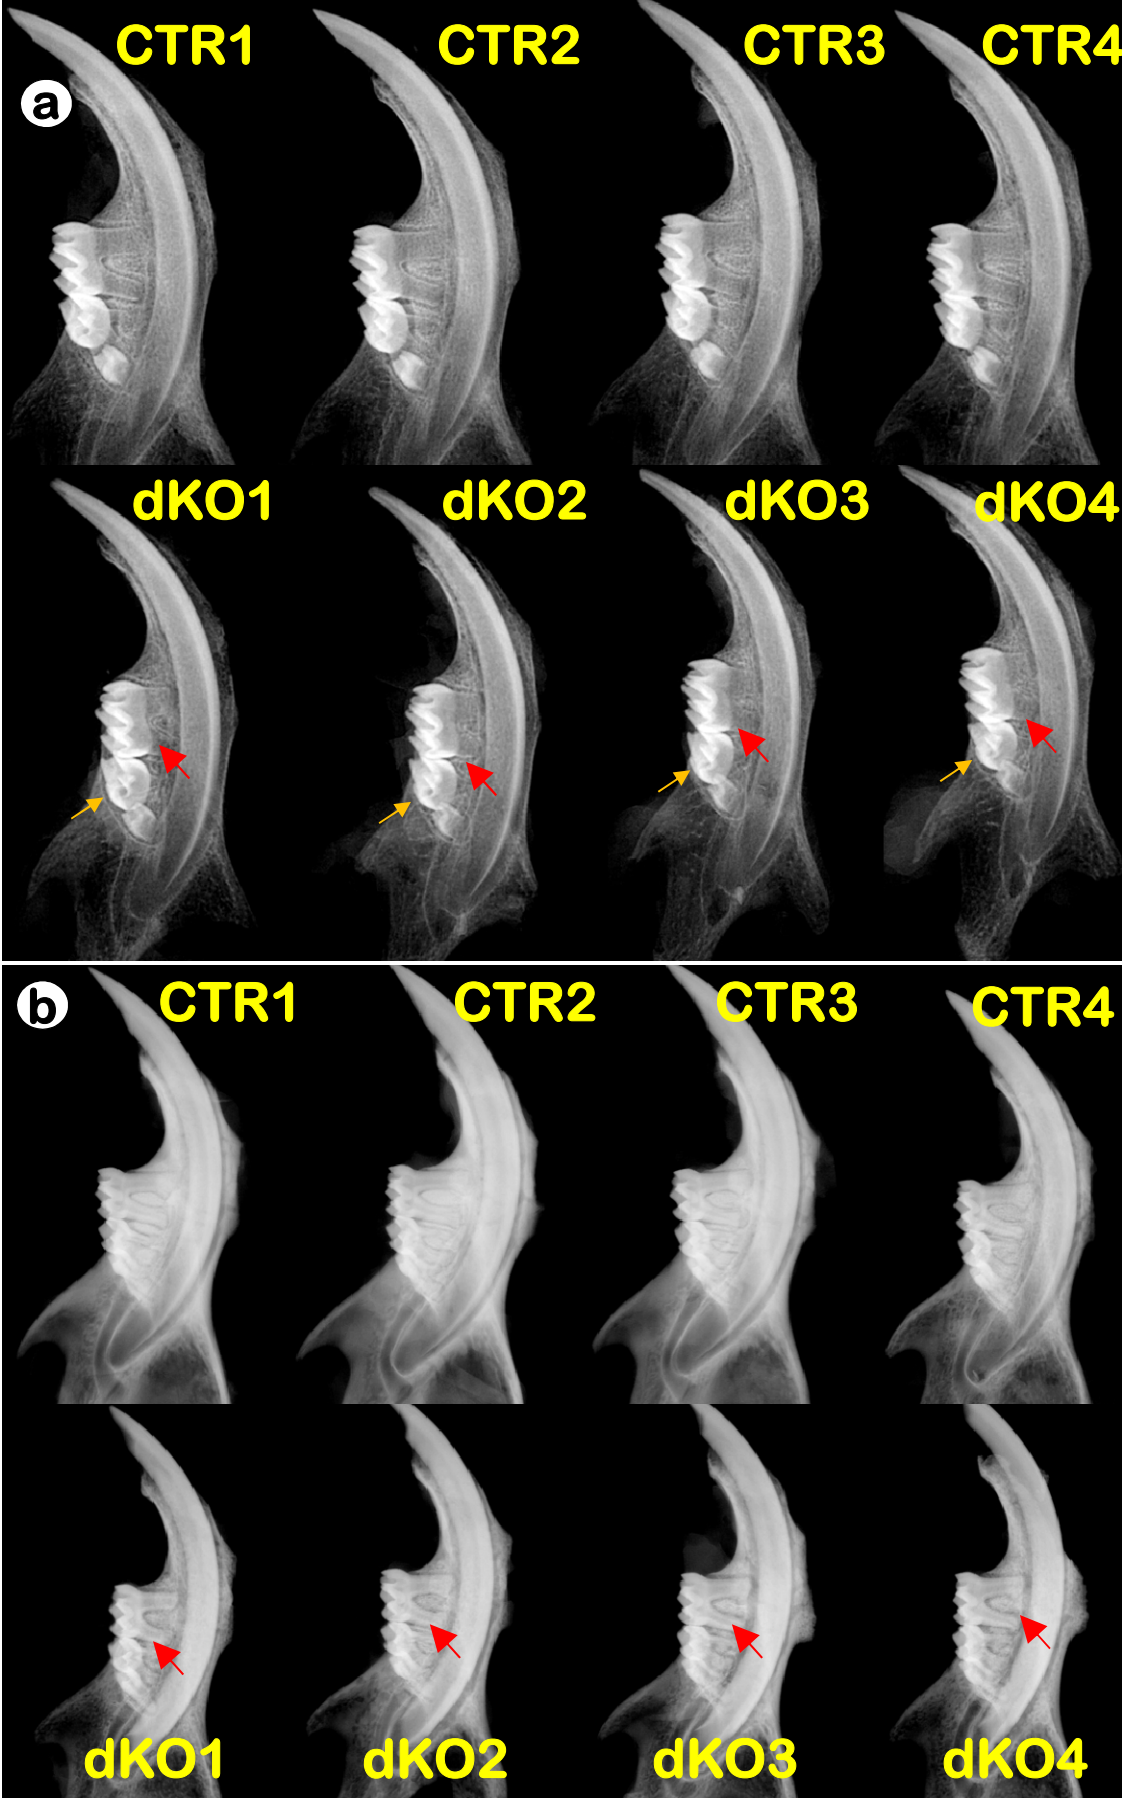

# Supplement Fig 3

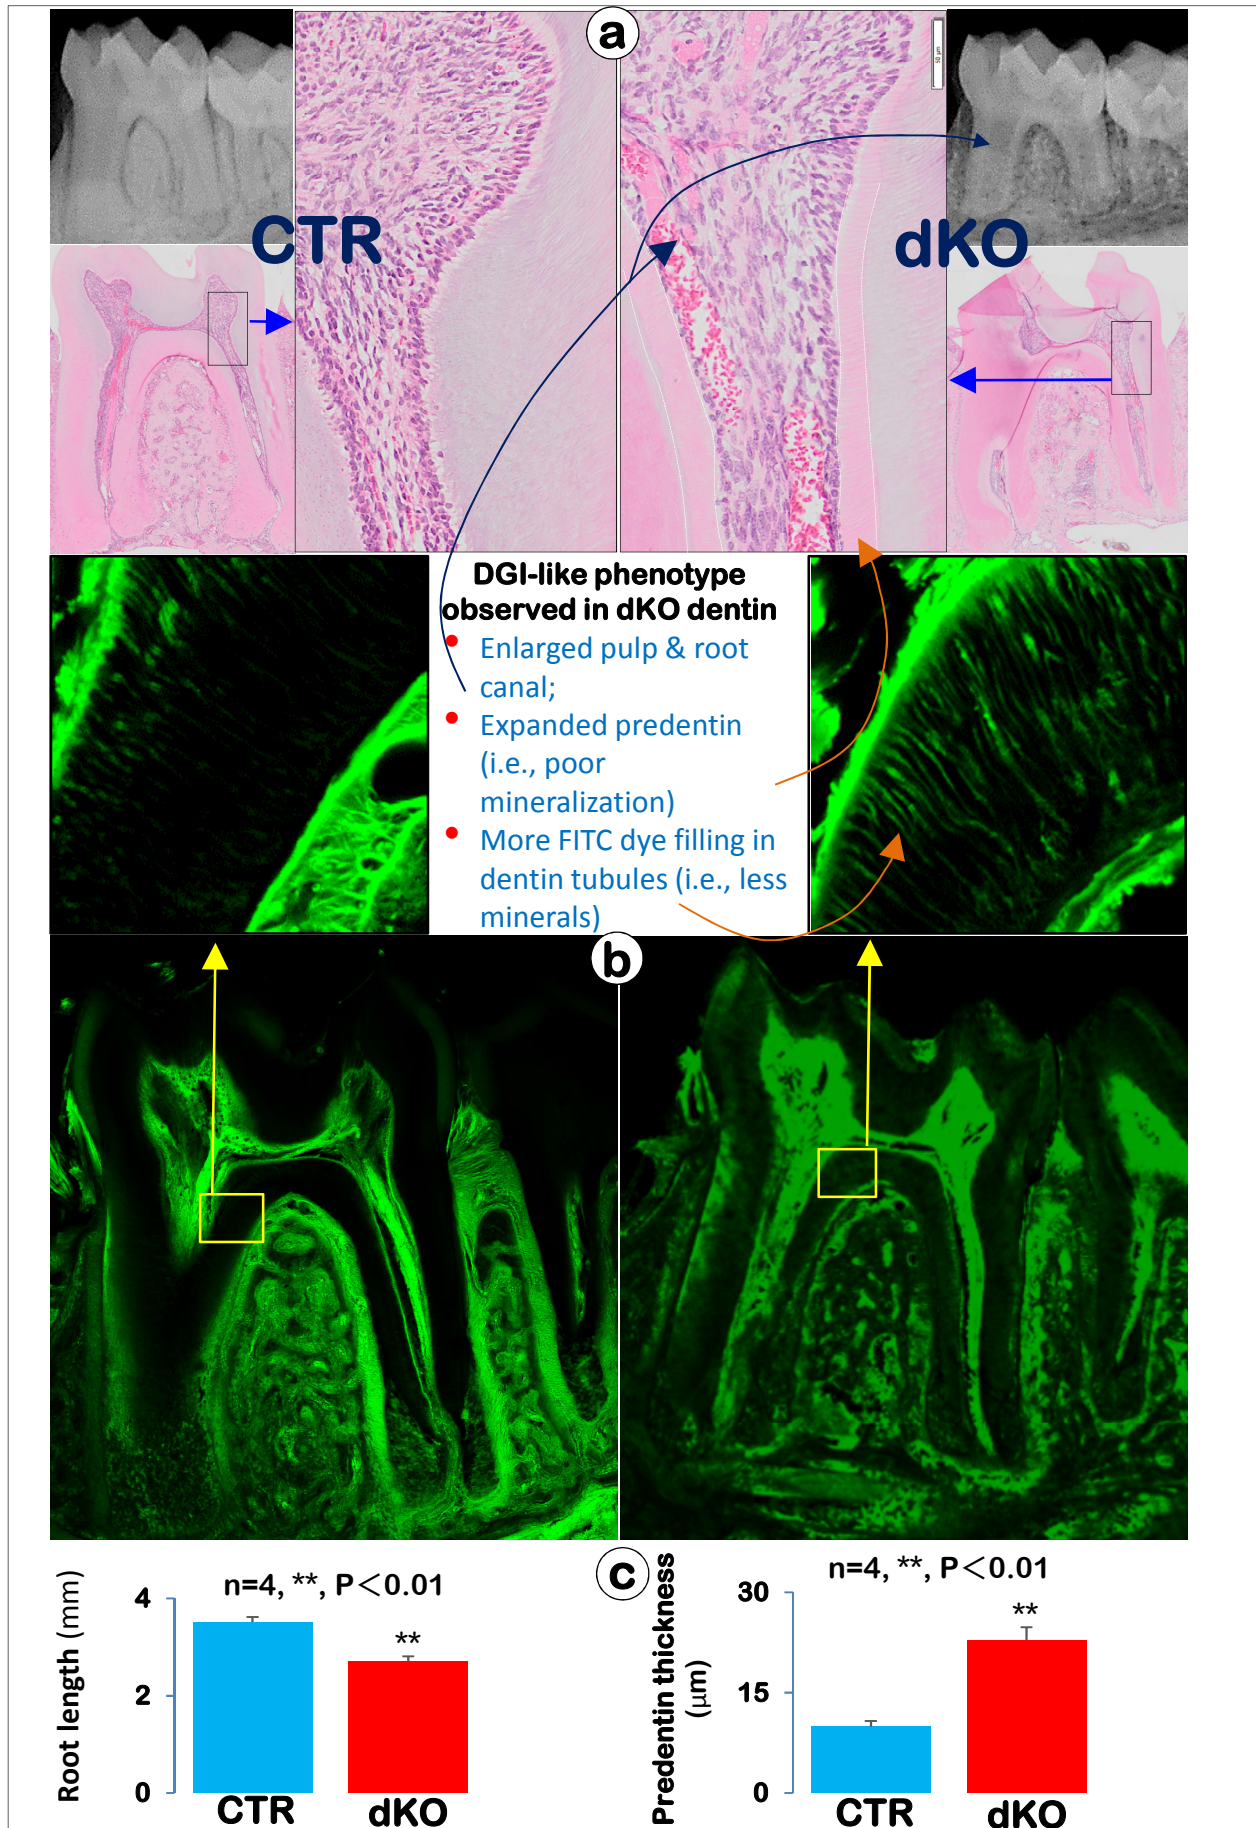

Supplement: NIHMS817179-supplement-2.pdf [file NIHMS817179-supplement-2.pdf]
